# Supplementary material for: Genome-Wide Identification and Expression Analysis of the SWEET Gene Family in Capsicum annuum L.
Source: MDPI journal article supplement (doi:10.3390/ijms242417408), 2023-12-12
Supplement: s1 [file s1]

Supplemental Table S1. The full-length sequence primers of *CaSWEET16/22/31*

| Gene Name | Primer                                                                                              |
|-----------|-----------------------------------------------------------------------------------------------------|
| CaSWEET16 | F: ttggagaggacacgctcgagATGATTACATTCAAAAGGATTATCACG<br>R: ataatccatgaattcctcgagTACTCCGCAATCCAGCTGACT |
| CaSWEET22 | F: ttggagaggacacgctcgagATGGTTAACCTTAGTCACTTAGCTC<br>R: ataatccatgaattcctcgagGGTTTCCACAGTTTGCAACT    |
| CaSWEET31 | F: ttggagaggacacgctcgagATGGCCATATTTGACCTCCAC<br>R: ataatccatgaattcctcgagTGCAGCACACACGACAAGC         |

F: Forward; R: Reverse
